# Supplementary material for: Surface modification of thermoplastics—towards the plastic biochip for high throughput screening devices
Source: Royal Society of Chemistry journal article supplement (doi:10.1039/b700322f), 2007-01-01
Supplement: b700322f.pdf [file b700322f.pdf]

Supplementary Material (ESI) for Lab on a Chip  
This journal is © The Royal Society of Chemistry 2007

## Towards the plastic biochip for high throughput screening devices

<sup>5</sup> Gerardo A. Diaz-Quijada,<sup>\*a</sup> Regis Peytavi,<sup>b</sup> André Nantel,<sup>c</sup> Emmanuel Roy,<sup>a</sup> Michel G. Bergeron,<sup>b</sup> Michel M. Dumoulin<sup>a</sup>, Teodor Veres.<sup>a</sup>

<sup>a</sup> Industrial Materials Institute, National Research Council of Canada, 75 de Mortagne, Boucherville, QC, Canada.

<sup>b</sup> Centre de recherche en infectiologie, Université Laval, 2705 Boul. Laurier, Sainte Foy, QC, Canada

<sup>c</sup> Biotechnology Research Institute, National Research Council of Canada, 6100 Royalmount Ave., Montreal, QC, Canada

\*To whom correspondence should be addressed. Tel: (450)-641-5023. Fax: (450)-641-5105. E-mail: [gerardo.diaz@cnrc-nrc.gc.ca](mailto:gerardo.diaz@cnrc-nrc.gc.ca)

10

## Supplementary Material

Gerardo A. Diaz-Quijada et al.,

### Figure Captions.

**Fig S1.** Optical transmission curves for the initial set of potential plastics.

**Fig S2.** Steady state emission fluorescence spectra from the plastics under consideration. Excitation was performed at 543 nm.

**Fig S3.** Steady state emission fluorescence spectra from the plastics under consideration. Excitation was performed at 633 nm.

**Fig S4.** Infrared spectra from Zeonor 1060R before and after oxidation with ozone and UV-ozone.

**Fig S5.** High-resolution carbon 1s spectrum of pristine Zeonex E48R.

**Fig S6.** Fluorescent images of a hybridised array of two different strands of DNA on Zeonex E48R illustrating selective binding of each complementary strand.

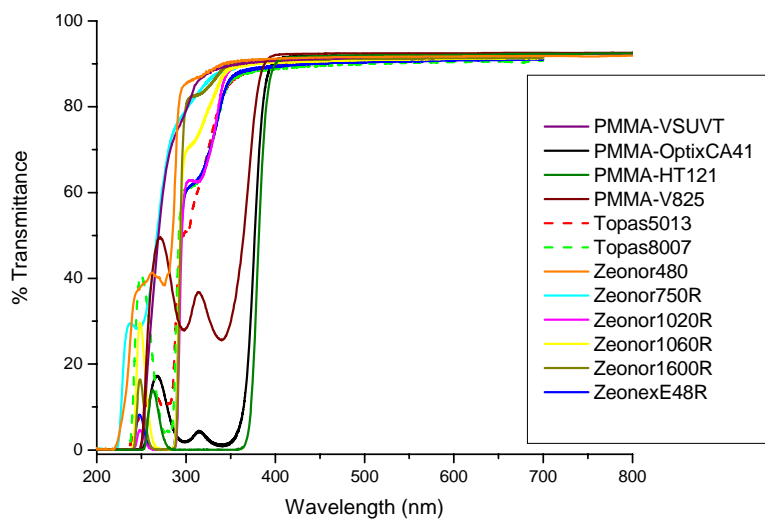

Fig S1 (Diaz-Quijada *et al.*)

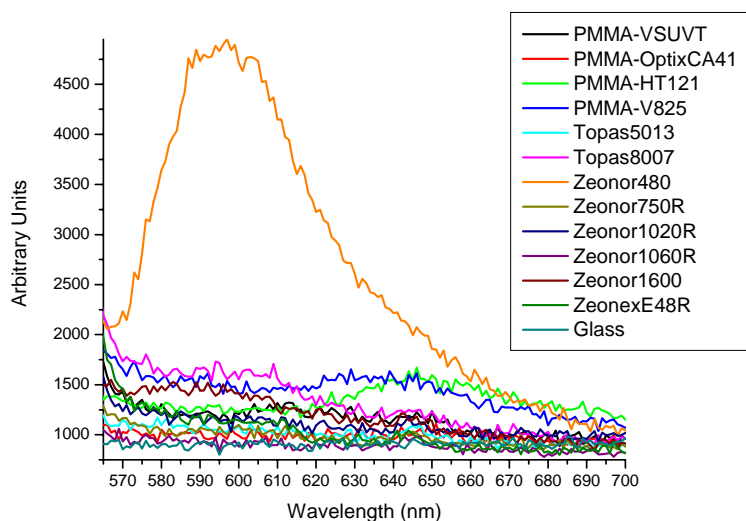

Fig S2 (Diaz-Quijada *et al.*)

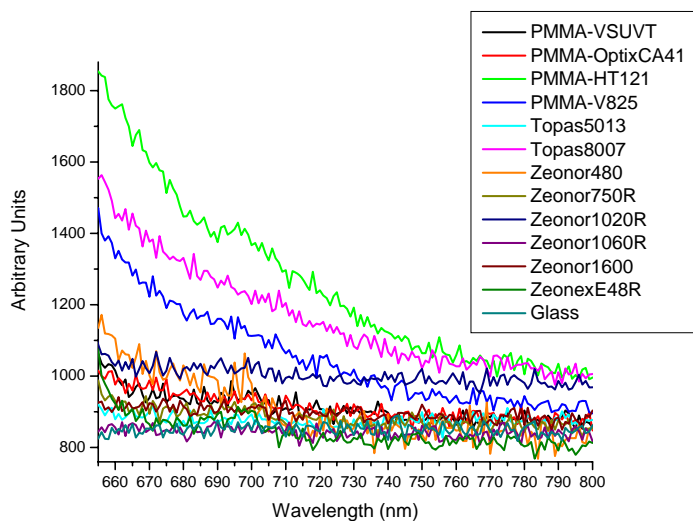

Fig S3 (Diaz-Quijada *et al.*)

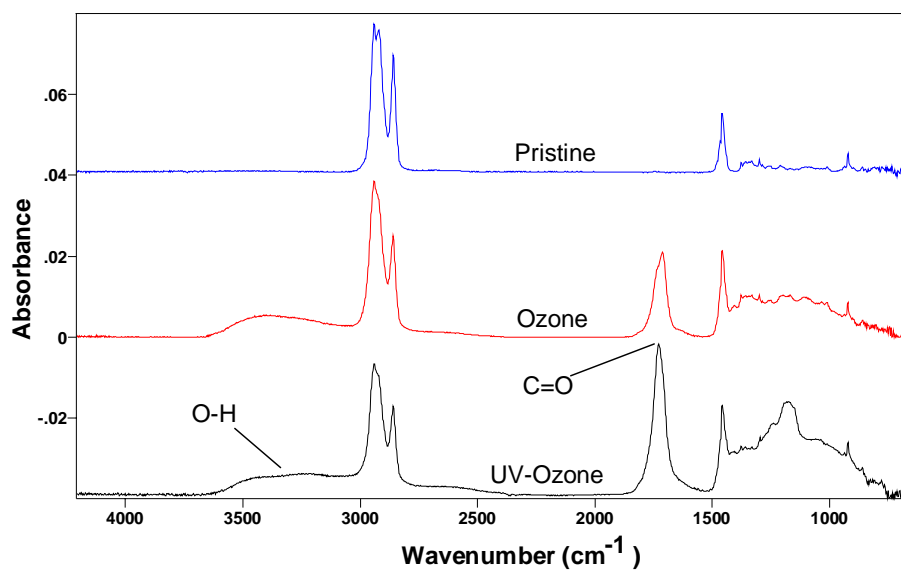

Fig S4 (Diaz-Quijada *et al.*)

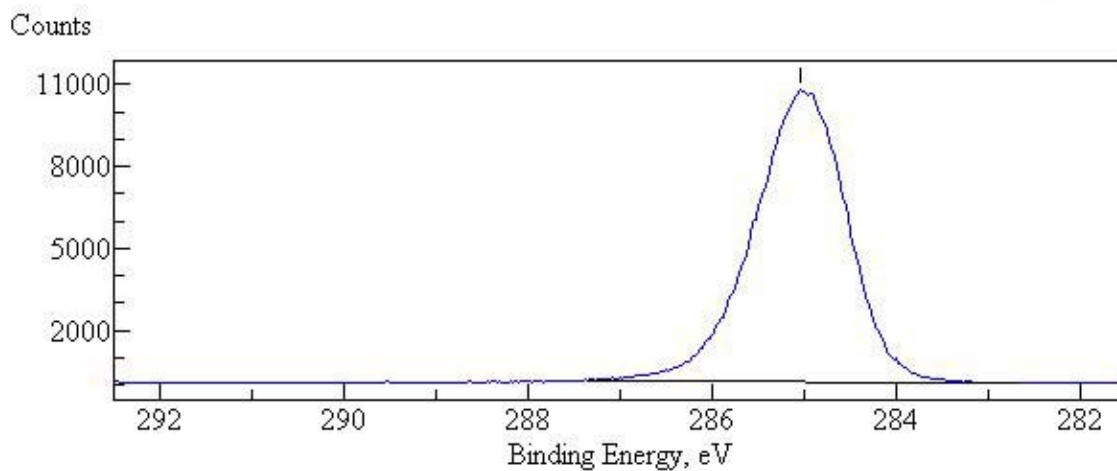

Fig S5 (Diaz-Quijada *et al.*)

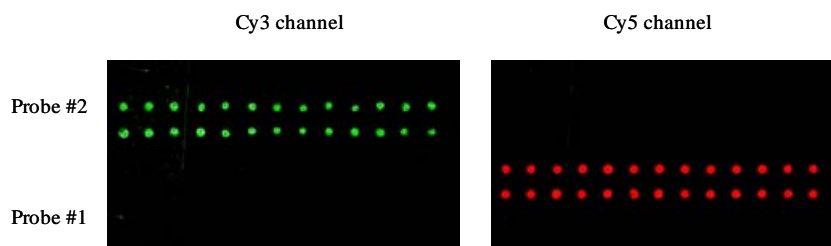

Fig S6 (Diaz-Quijada *et al.*)
